# Supplementary figures and images for: Physiological and Genetic Analysis of Leaves from the Resprouters of an Old Ginkgo biloba Tree
Source: MDPI journal article supplement (doi:10.3390/f12091255), 2021-09-15

Description

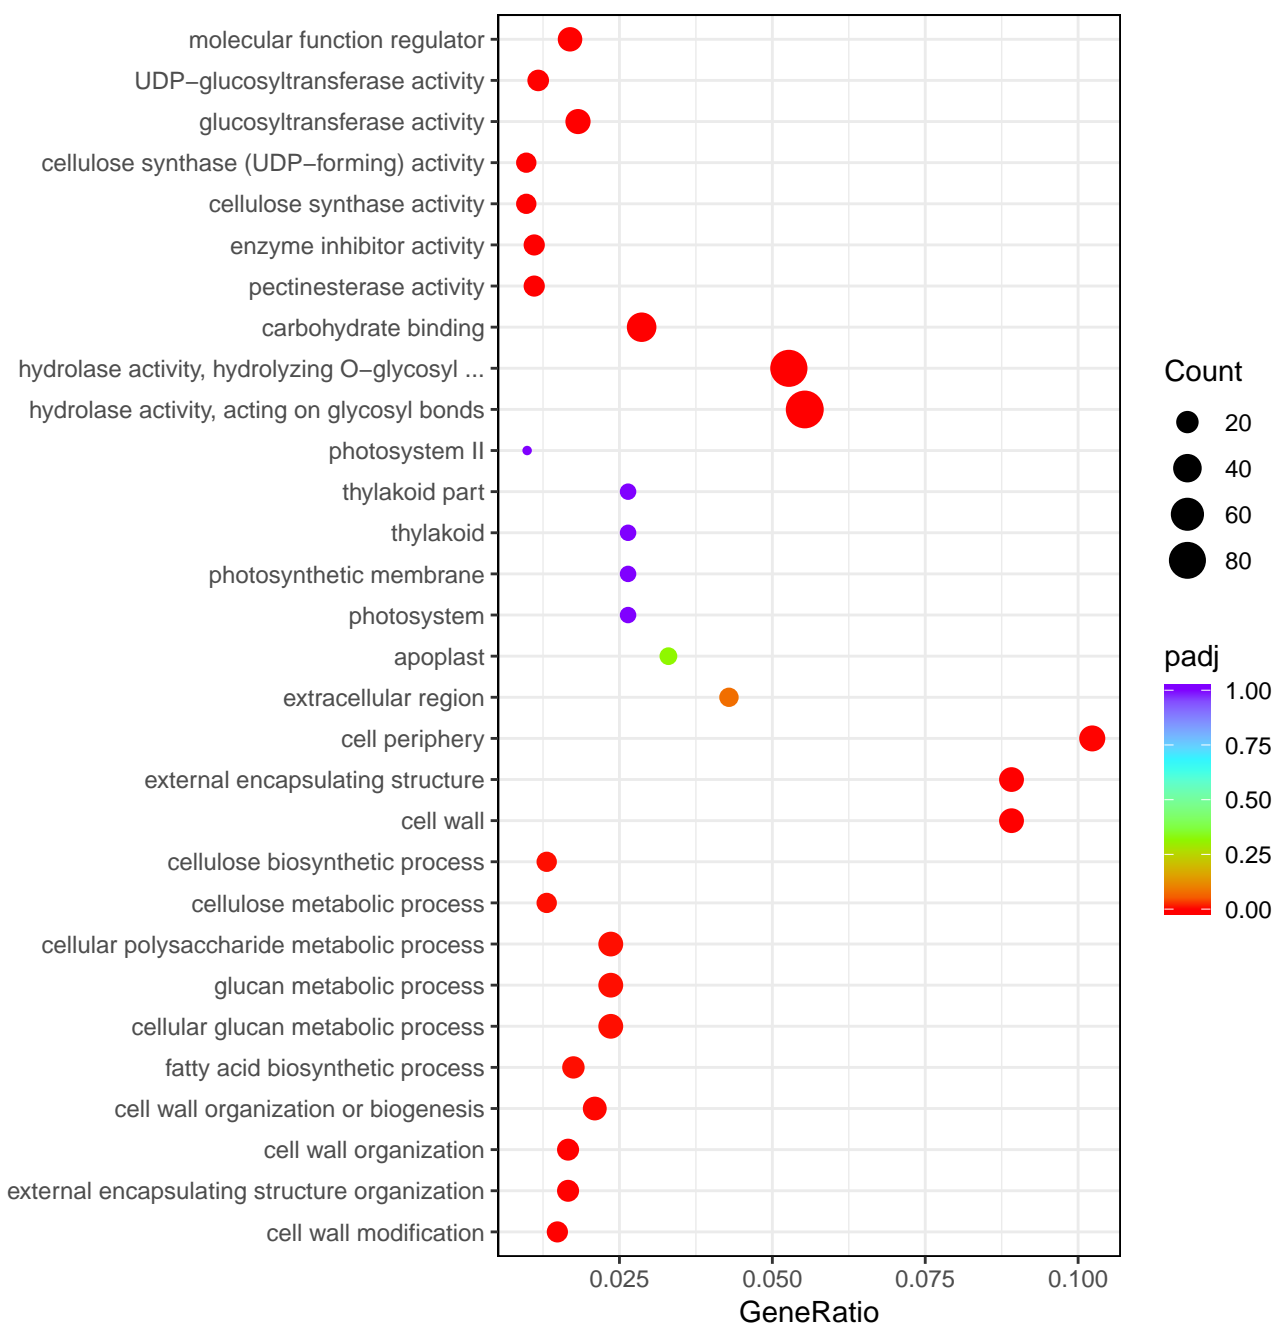

Supplement: s1 [file s1]
